# Supplementary material for: Towards directional assembly of hierarchical structures: aniline oligomers as the model precursors
Source: Royal Society of Chemistry journal article supplement (doi:10.1039/c3nr00145h), 2013-01-01
Supplement: c3nr00145h.pdf [file c3nr00145h.pdf]

## Supplementary data

### **Towards Directional Assembly of Hierarchical Structures: Aniline**

#### **Oligomers as the Model Precursors**

Yanchai Zhao,<sup>a, b, c</sup> Jaroslav Stejskal,<sup>d</sup> and Jixiao Wang<sup>a, b, c \*</sup>

<sup>a</sup> *Chemical Engineering Research Center, School of Chemical Engineering and Technology, Tianjin University, Tianjin 300072, P. R. China*

<sup>b</sup> *State Key Laboratory of Chemical Engineering, Tianjin University, Tianjin 300072, P. R. China*

<sup>c</sup> *Tianjin Key Laboratory of Membrane Science and Desalination Technology, Tianjin University, Tianjin 300072, P. R. China*

<sup>d</sup> *Institute of Macromolecular Chemistry, Academy of Sciences of the Czech Republic, Heyrovsky Sq. 2, 162 06 Prague 6, Czech Republic*

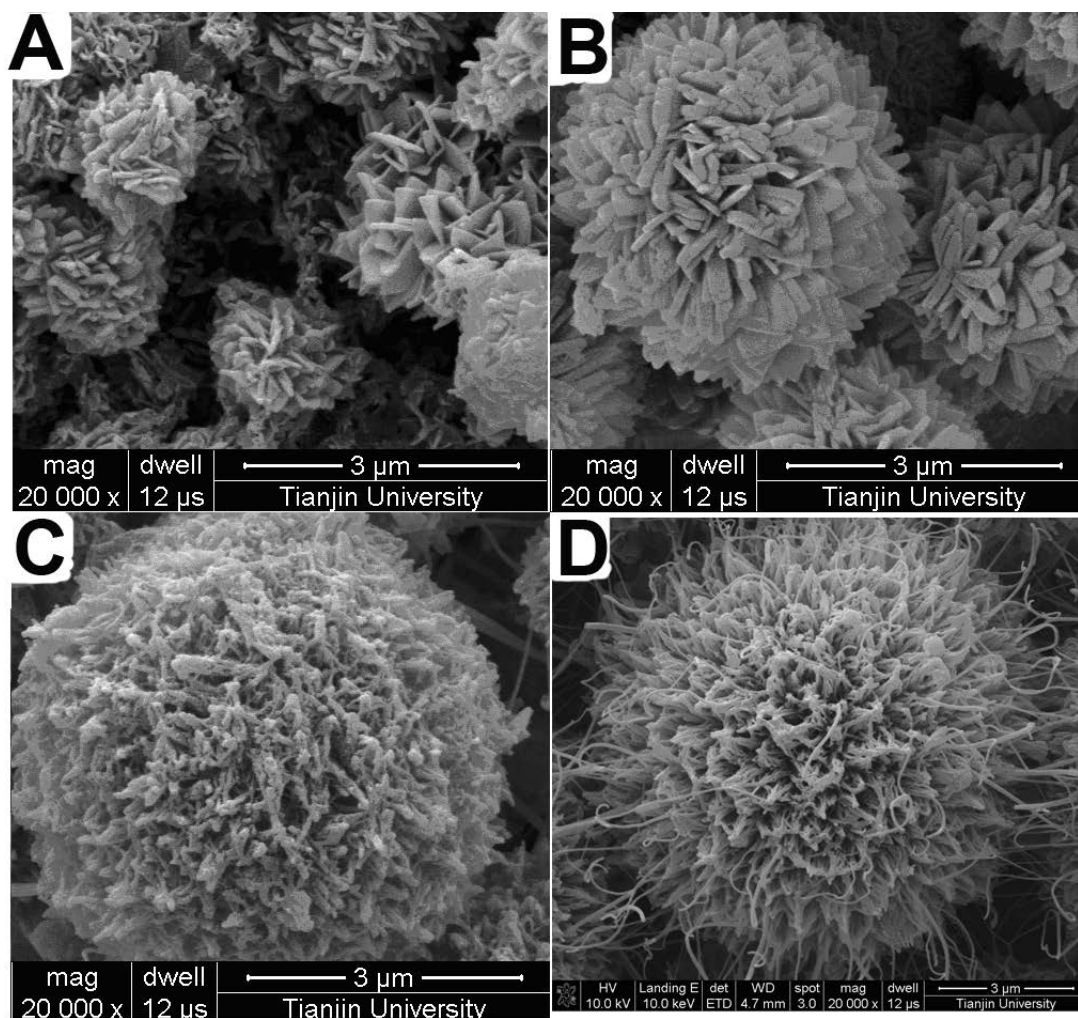

Fig. S1 SEM images of aniline oligomer microstructures obtained at different reaction times: (A) 20 min, (B) 40min, (C) 2 h, (D) 4h.
